# Supplementary material for: Translational predictions of phase 2a first-in-patient efficacy studies for antituberculosis drugs
Source: PubMed Central journal article supplement — Eur Respir J. 2023 Aug 31;62(2):2300165. doi: 10.1183/13993003.00165-2023 (PMC10469274; doi:10.1183/13993003.00165-2023), 2023-08-31

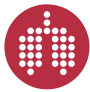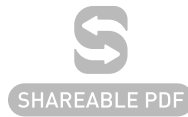

# Translational predictions of phase 2a first-in-patient efficacy studies for antituberculosis drugs

Jacqueline P. Ernest <sup>1,3</sup>, Janice Jia Ni Goh <sup>1,3</sup>, Natasha Strydom <sup>1,3</sup>, Qianwen Wang <sup>1,3</sup>,  
Rob C. van Wijk <sup>1,3</sup>, Nan Zhang <sup>1,3</sup>, Amelia Deitchman<sup>1</sup>, Eric Nuermberger <sup>2</sup> and Rada M. Savic <sup>1</sup>

<sup>1</sup>Department of Bioengineering and Therapeutic Sciences, University of California, San Francisco, San Francisco, CA, USA. <sup>2</sup>Center for Tuberculosis Research, Department of Medicine, Johns Hopkins University School of Medicine, Baltimore, MA, USA. <sup>3</sup>Shared authorship ordered alphabetically.

Corresponding author: Rada M. Savic ([rada.savic@ucsf.edu](mailto:rada.savic@ucsf.edu))

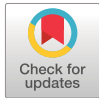

Shareable abstract (@ERSpublications)

A translational pharmacology platform to predict early bactericidal activity <https://bit.ly/3NoO89J>

**Cite this article as:** Ernest JP, Goh JJN, Strydom N, *et al.* Translational predictions of phase 2a first-in-patient efficacy studies for antituberculosis drugs. *Eur Respir J* 2023; 62: 2300165 [DOI: 10.1183/13993003.00165-2023].

This extracted version can be shared freely online.

Copyright ©The authors 2023.

This version is distributed under the terms of the Creative Commons Attribution Non-Commercial Licence 4.0. For commercial reproduction rights and permissions contact [permissions@ersnet.org](mailto:permissions@ersnet.org)

This article has an editorial commentary:  
<https://doi.org/10.1183/13993003.01108-2023>

Received: 25 Jan 2023  
Accepted: 2 June 2023

## Abstract

**Background:** Phase 2a trials in tuberculosis typically use early bactericidal activity (EBA), the decline in sputum CFU over 14 days, as the primary end-point for testing the efficacy of drugs as monotherapy. However, the cost of phase 2a trials can range from USD 7 million to USD 19.6 million on average, while >30% of drugs fail to progress to phase 3. Better utilising pre-clinical data to predict and prioritise the most likely drugs to succeed will thus help to accelerate drug development and reduce costs. We aim to predict clinical EBA using pre-clinical *in vivo* pharmacokinetic (PK)-pharmacodynamic (PD) data and a model-based translational pharmacology approach.

**Methods and findings:** First, mouse PK, PD and clinical PK models were compiled. Second, mouse PK-PD models were built to derive an exposure–response relationship. Third, translational prediction of clinical EBA studies was performed using mouse PK-PD relationships and informed by clinical PK models and species-specific protein binding. Presence or absence of clinical efficacy was accurately predicted from the mouse model. Predicted daily decreases of CFU in the first 2 days of treatment and between day 2 and day 14 were consistent with clinical observations.

**Conclusion:** This platform provides an innovative solution to inform or even replace phase 2a EBA trials, to bridge the gap between mouse efficacy studies and phase 2b and phase 3 trials, and to substantially accelerate drug development.

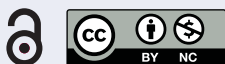

Supplement: ERJ-00165-2023.Shareable.pdf [file ERJ-00165-2023.Shareable.pdf]
